# Supplementary material for: Genome rearrangements and phylogeny reconstruction in Yersinia pestis
Source: PubMed Central journal article supplement (PMC5877447; doi:10.7717/peerj.4545), 2018-03-27

# A

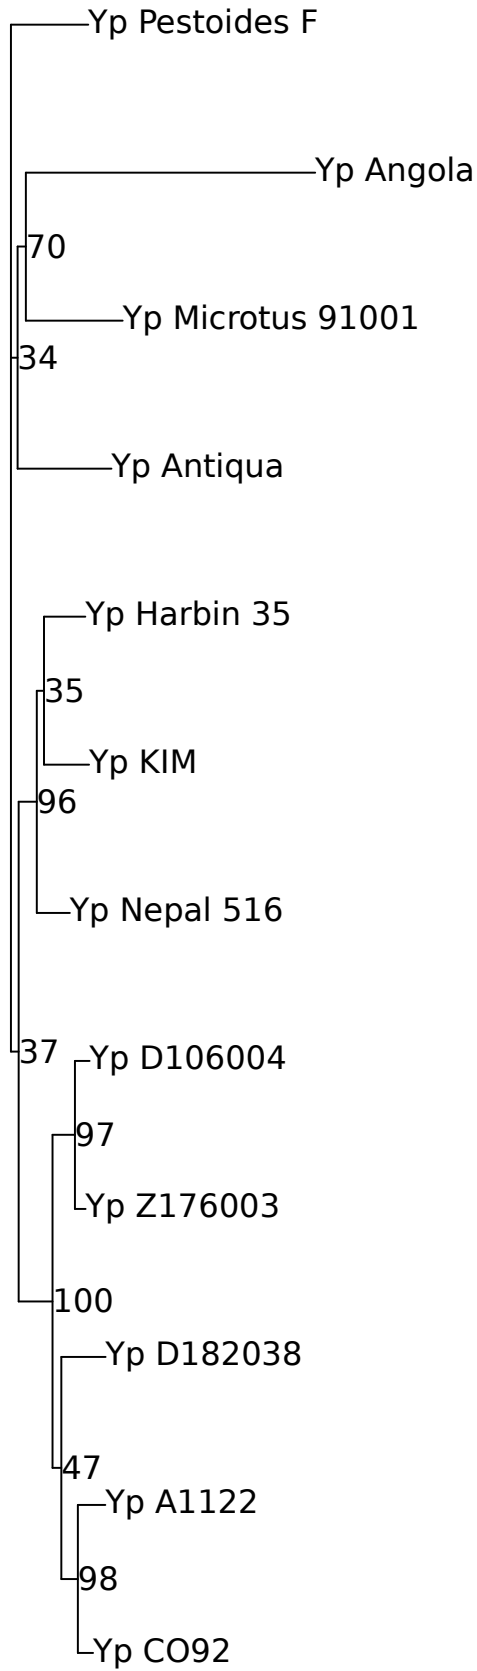

# B

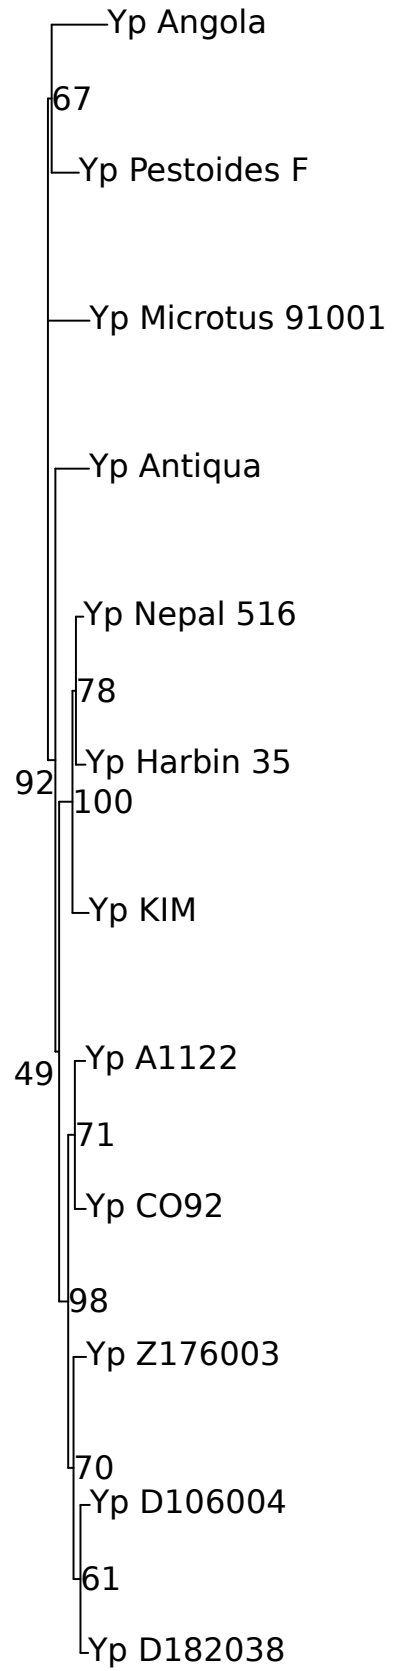

Supplement: peerj-06-4545-s003.pdf [file peerj-06-4545-s003.pdf]
